# Supplementary material
Source: PubMed Central journal article supplement (PMC6834057)
Supplement: rspb20191992_review_history.pdf [file rspb20191992_review_history.pdf]

## Ecological opportunity shapes a large Arctic charr species radiation

Carmela J. Doenz, Andrin K. Krähenbühl, Jonas Walker, Ole Seehausen and Jakob Brodersen

### Article citation details

*Proc. R. Soc. B* **286**: 20191992.  
<http://dx.doi.org/10.1098/rspb.2019.1992>

### Review timeline

Original submission: 27 August 2019  
Revised submission: 20 September 2019  
Final acceptance: 30 September 2019

Note: Reports are unedited and appear as submitted by the referee. The review history appears in chronological order.

## Review History

### Decision letter (RSPB-2019-1992.R0)

10-Sep-2019

Dear Ms Doenz

I am pleased to inform you that your Review manuscript RSPB-2019-1992 entitled "Ecological opportunity shapes a large Arctic charr species radiation" has been accepted for publication in Proceedings B.

The referee(s) do not recommend any further changes. Therefore, please proof-read your manuscript carefully and upload your final files for publication. Because the schedule for publication is very tight, it is a condition of publication that you submit the revised version of your manuscript within 7 days. If you do not think you will be able to meet this date please let me know immediately.

To upload your manuscript, log into <http://mc.manuscriptcentral.com/prsb> and enter your Author Centre, where you will find your manuscript title listed under "Manuscripts with Decisions." Under "Actions," click on "Create a Revision." Your manuscript number has been appended to denote a revision.

You will be unable to make your revisions on the originally submitted version of the manuscript. Instead, upload a new version through your Author Centre.

Before uploading your revised files please make sure that you have:

1) A text file of the manuscript (doc, txt, rtf or tex), including the references, tables (including captions) and figure captions. Please remove any tracked changes from the text before submission. PDF files are not an accepted format for the "Main Document".

2) A separate electronic file of each figure (tiff, EPS or print-quality PDF preferred). The format should be produced directly from original creation package, or original software format. Please note that PowerPoint files are not accepted.

3) Electronic supplementary material: this should be contained in a separate file from the main text and the file name should contain the author's name and journal name, e.g. `authorname_procb_ESM_figures.pdf`

All supplementary materials accompanying an accepted article will be treated as in their final form. They will be published alongside the paper on the journal website and posted on the online figshare repository. Files on figshare will be made available approximately one week before the accompanying article so that the supplementary material can be attributed a unique DOI. Please see: <https://royalsociety.org/journals/authors/author-guidelines/>

4) Data-Sharing and data citation

It is a condition of publication that data supporting your paper are made available. Data should be made available either in the electronic supplementary material or through an appropriate repository. Details of how to access data should be included in your paper. Please see <https://royalsociety.org/journals/ethics-policies/data-sharing-mining/> for more details.

If you wish to submit your data to Dryad (<http://datadryad.org/>) and have not already done so you can submit your data via this link

<http://datadryad.org/submit?journalID=RSPB&manu=RSPB-2019-1992> which will take you to your unique entry in the Dryad repository.

If you have already submitted your data to dryad you can make any necessary revisions to your dataset by following the above link.

5) For more information on our Licence to Publish, Open Access, Cover images and Media summaries, please visit <https://royalsociety.org/journals/authors/author-guidelines/>.

Once again, thank you for submitting your manuscript to Proceedings B and I look forward to receiving your final version. If you have any questions at all, please do not hesitate to get in touch.

Sincerely,  
Professor Gary Carvalho  
<mailto:proceedingsb@royalsociety.org>

Associate Editor Board Member: 1

Comments to Author:

This study received two favourable reviews in the first submission, with both Referees supportive of a study on the role of ecological opportunity in adaptive radiations, a topic that is

ubiquitous throughout theory regarding the ecology of adaptive radiations, but has rarely been empirically tested in the context of its role in the extent and bounds that radiating taxa expand resource use and phenotypic variation in young radiations – which is novel. With a great deal of sampling effort and a combination of phenotypic, genetic and stable isotope analysis, the authors test the expectation of greater ecological specialization (more extreme trait values) with increasing ecological opportunity. Supporting their prediction, lake size was positively correlated with the extent of ecomorphological specialization. Furthermore, assemblage-wide morphospace increased when more than one genetic cluster is present, collectively demonstrating that ecological opportunity and speciation jointly determine phenotypic expansion in this charr radiation and contribute an important empirical piece supporting the ecological theory of adaptive radiation. In my own review of this resubmission, this revision largely addresses previous concerns about the clarity and scope of the findings. Nonetheless, there are some points that would still benefit from revision. I would recommend accept following these minor changes.

Line 63 – The definition and significance of ecological opportunity could be bolstered, especially in the context of the objectives. For example, Wellborn and Langerhans (Ecol Evol 2015) provide a framework that ties nicely into the concept of both niche availability and niche expansion – which would help clarify the importance of the objectives in the MS

Line 67 – does it also determine the pace of adaptive radiation?

Line 393 – Given the limitations in the genetic data – considering these genetic clusters “from now on as two distinct species” is an overstatement not fully supported by the data and does not contribute to the findings of the paper. Please remove this sentence or scale it down.

## Author's Response to Decision Letter for (RSPB-2019-1992.R0)

See Appendix A.

## Decision letter (RSPB-2019-1992.R1)

30-Sep-2019

Dear Ms Doenz

I am pleased to inform you that your manuscript entitled "Ecological opportunity shapes a large Arctic charr species radiation" has been accepted for publication in Proceedings B.

You can expect to receive a proof of your article from our Production office in due course, please check your spam filter if you do not receive it. PLEASE NOTE: you will be given the exact page length of your paper which may be different from the estimation from Editorial and you may be asked to reduce your paper if it goes over the 10 page limit.

If you are likely to be away from e-mail contact please let us know. Due to rapid publication and an extremely tight schedule, if comments are not received, we may publish the paper as it stands.

If you have any queries regarding the production of your final article or the publication date please contact [procb\\_proofs@royalsociety.org](mailto:procb_proofs@royalsociety.org)

#### Open Access

You are invited to opt for Open Access, making your freely available to all as soon as it is ready for publication under a CCBY licence. Our article processing charge for Open Access is £1700.

Corresponding authors from member institutions

(<http://royalsocietypublishing.org/site/librarians/allmembers.xhtml>) receive a 25% discount to these charges. For more information please visit <http://royalsocietypublishing.org/open-access>.

Your article has been estimated as being 10 pages long. Our Production Office will be able to confirm the exact length at proof stage.

#### Paper charges

An e-mail request for payment of any related charges will be sent out after proof stage (within approximately 2-6 weeks). The preferred payment method is by credit card; however, other payment options are available

#### Electronic supplementary material:

All supplementary materials accompanying an accepted article will be treated as in their final form. They will be published alongside the paper on the journal website and posted on the online figshare repository. Files on figshare will be made available approximately one week before the accompanying article so that the supplementary material can be attributed a unique DOI.

Thank you for your fine contribution. On behalf of the Editors of the Proceedings B, we look forward to your continued contributions to the Journal.

Sincerely,

Professor Gary Carvalho  
Editor, Proceedings B  
<mailto:proceedingsb@royalsociety.org>

Associate Editor:

Board Member

Comments to Author:

(There are no comments.)
